1           **SARS-CoV-2 viroporin triggers the NLRP3 inflammatory pathway**

2  
3  
4  
5  
6  
7  
8  
9  
10  
11  
12  
13  
14  
15  
16  
17  
18  
19  
20  
21  
22  
23  
24

**Authors:** Huanzhou Xu,<sup>1</sup> Siddhi A. Chitre,<sup>1</sup> Ibukun A. Akinyemi,<sup>2</sup> Julia C. Loeb,<sup>3,4</sup> John A. Lednicky,<sup>3,4</sup> Michael T. McIntosh,<sup>2,5</sup> and Sumita Bhaduri-McIntosh<sup>1,5,\*</sup>

**Affiliations:**

<sup>1</sup>Division of Infectious Disease, Department of Pediatrics, University of Florida, Gainesville, FL, U.S.A.

<sup>2</sup>Child Health Research Institute, Department of Pediatrics, University of Florida, Gainesville, FL, U.S.A.

<sup>3</sup>Department of Environmental and Global Health, College of Public Health and Health Professions, University of Florida, Gainesville, FL, U.S.A.

<sup>4</sup>Emerging Pathogens Institute, University of Florida, Gainesville, FL, U.S.A.

<sup>5</sup>Department of Molecular Genetics and Microbiology, University of Florida, Gainesville, FL, U.S.A.

\* To whom correspondence should be addressed at [sbhadurimcintosh@ufl.edu](mailto:sbhadurimcintosh@ufl.edu)

**Short title:** SARS-CoV-2 viroporin sparks inflammasome

25 **Abstract**

26 Cytokine storm resulting from a heightened inflammatory response is a prominent feature of severe  
27 COVID-19 disease. This inflammatory response results from assembly/activation of a cell-  
28 intrinsic defense platform known as the inflammasome. We report that the SARS-CoV-2 viroporin  
29 encoded by ORF3a activates the NLRP3 inflammasome, the most promiscuous of known  
30 inflammasomes. ORF3a triggers IL-1 $\beta$  expression via NF $\kappa$ B, thus priming the inflammasome  
31 while also activating it via ASC-dependent and -independent modes. ORF3a-mediated  
32 inflammasome activation requires efflux of potassium ions and oligomerization between NEK7  
33 and NLRP3. With the selective NLRP3 inhibitor MCC950 able to block ORF3a-mediated  
34 inflammasome activation and key ORF3a residues needed for virus release and inflammasome  
35 activation conserved in SARS-CoV-2 isolates across continents, ORF3a and NLRP3 present prime  
36 targets for intervention.

37

38

39

40

41

42

43

44

45

46 **Summary**

47 Development of anti-SARS-CoV-2 therapies is aimed predominantly at blocking infection or  
48 halting virus replication. Yet, the inflammatory response is a significant contributor towards  
49 disease, especially in those severely affected. In a pared-down system, we investigate the influence  
50 of ORF3a, an essential SARS-CoV-2 protein, on the inflammatory machinery and find that it  
51 activates NLRP3, the most prominent inflammasome by causing potassium loss across the cell  
52 membrane. We also define key amino acid residues on ORF3a needed to activate the inflammatory  
53 response, and likely to facilitate virus release, and find that they are conserved in virus isolates  
54 across continents. These findings reveal ORF3a and NLRP3 to be attractive targets for therapy.

55

56

57

58

59

60

61

62

63

64

65

66 **Main Text**

67 Worldwide reports of COVID-19 indicate that effective management of severely ill individuals  
68 will require both antiviral and anti-inflammatory strategies. Indeed, during the second week of  
69 illness, those with severe disease experience cytokine storms indicating a massive inflammatory  
70 surge <sup>1,2</sup>. This inflammatory response, composed of IL-1 $\beta$  and other cytokines, results from  
71 assembly/activation of a multiprotein host machinery known as the inflammasome in both immune  
72 and non-immune cells such as airway epithelial cells – the most prominent is the NLRP3 (NOD-,  
73 LRR- and pyrin domain-containing protein 3)-inflammasome – and several lines of evidence tie  
74 activation of the NLRP3-inflammasome to severe SARS-CoV-2 pathology, including i)  
75 individuals with comorbidities such as diabetes, atherosclerosis, and obesity (all pro-inflammatory  
76 conditions marked by NLRP3 activation) <sup>3-8</sup> are at greater risk for severe disease <sup>9-11</sup>, ii) viroporins  
77 expressed by the closely-related SARS-CoV activate the NLRP3 inflammasome <sup>12</sup>, and iii) bats,  
78 the asymptomatic reservoir of CoVs that are highly pathogenic in humans, are naturally defective  
79 in activating the NLRP3-inflammasome <sup>13</sup>. Although cellular ACE2 engagement by SARS-CoV-  
80 2 spike protein can cause expression of pro-inflammatory genes <sup>14</sup>, whether CoV-2 activates the  
81 inflammasome remains unexplored.

82

83 Given the central role of inflammation in severe COVID-19 and the high level of conservation of  
84 the viroporin ORF3a across CoV genomes, we investigated the influence of the SARS-CoV-2  
85 ORF3a on the NLRP3 inflammasome. Viroporins are virus-encoded proteins that are considered  
86 virulence factors. Though typically not essential for virus replication, some of these small  
87 hydrophobic proteins can form pores that facilitate ion transport across cell membranes, and by so  
88 doing, ensure virus release with the potential for coincident inflammasome activation <sup>15,16</sup>. A

89 component of the innate immune system, the inflammasome assembles and responds to invading  
90 organisms, thus forming the first line of defense against infections <sup>17</sup>. Our experiments show that  
91 the CoV-2 ORF3a protein primes and activates the inflammasome via efflux of potassium ions  
92 and the kinase NEK7. Its ability to activate caspase 1, the central mediator of proinflammatory  
93 responses, depends on NLRP3 since a selective inhibitor of NLRP3 blocks this pathway in infected  
94 cells. Importantly, we find that although the CoV-2 ORF3a protein has diverged somewhat from  
95 its homologs in other CoVs, some of these newly divergent residues are essential for activating the  
96 NLRP3 inflammasome and are perfectly conserved in virus isolates across continents.

97

98 **SARS-CoV-2 viroporin ORF3a primes and activates the inflammasome, prompting cell**  
99 **death.**

100 With lung as the predominant site of pathology along with established tropism for kidney and other  
101 organs <sup>18</sup>, we introduced ORF3a into lung origin A549 cells and for comparison, kidney origin  
102 HEK-293T cells, cell types that readily support SARS-CoV-2 infection <sup>19</sup>, and found induction of  
103 pro-IL-1 $\beta$  in both cell types, consistent with priming of the inflammasome. Compared to empty  
104 vector-exposed cells, ORF3a also increased the levels of cleaved, i.e. the active form of the pro-  
105 inflammatory caspase, caspase 1, as well as the cleaved form of the caspase 1 substrate, pro-IL-  
106 1 $\beta$ , indicating activation of the inflammasome, again in both cell types (Fig.1A). Priming by  
107 ORF3a resulted from NF $\kappa$ B-mediated expression of *IL-1 $\beta$*  message (Fig.1B) as indicated by  
108 increased I $\kappa$ B $\alpha$  phosphorylation and enrichment of NF $\kappa$ B p65 at the *IL-1 $\beta$*  promoter in ORF3a-  
109 exposed cells (Figs.1C-E). ORF3a also caused cleavage/activation of Gasdermin D, the  
110 pyroptosis-inducing caspase 1-substrate, indicated by an increase in the N-terminal fragment of

111 Gasdermin D (Fig.1F). This was accompanied by ORF3a-mediated increased cleavage/activation  
112 of caspase 3 and cell death, likely secondary to both pyroptosis and apoptosis (Figs.1G and H).  
113 Thus, ORF3a primes the inflammasome by triggering NF $\kappa$ B-mediated expression of pro-IL-1 $\beta$   
114 while also activating the inflammasome to cleave pro-caspase-1, pro-IL-1 $\beta$ , and the pore-forming  
115 Gasdermin D, inducing cell death.

116

117 **ORF3a activates the NEK7-NLRP3 inflammasome via ASC-dependent and independent**  
118 **modes.**

119 In probing the mechanism of ORF3a-mediated activation of the inflammasome, we found that it  
120 enhanced NLRP3 protein levels, and knockdown of NLRP3 curbed ORF3a-directed caspase 1  
121 cleavage (Figs.2A-B), indicating priming and activation of the NLRP3 inflammasome by ORF3a.  
122 Further, MCC950, a selective small molecule inhibitor that binds to the NACHT domain of  
123 NLRP3 and curtails its activation by blocking ATP hydrolysis <sup>20</sup>, also blocks ORF3a-mediated  
124 activation of the inflammasome in low micromolar concentrations (Fig.2C). Moreover, with the  
125 NIMA-related kinase NEK7 recently linked to NLRP3 activation <sup>16</sup>, we also depleted NEK7 and  
126 found that ORF3a was impaired in its ability to cause cleavage of caspase 1, i.e. unable to activate  
127 the inflammasome (Fig.2D). The NLRP3 inflammasome is activated by a variety of cell-extrinsic  
128 and -intrinsic stimuli that trigger the assembly of the inflammasome machinery wherein NLRP3  
129 oligomerizes with the adaptor protein ASC (Apoptosis-associated speck-like protein containing a  
130 CARD) leading to recruitment of pro-caspase 1 which is then activated by proximity-induced  
131 intermolecular cleavage. Given ORF3a-mediated inflammasome activation in HEK-293T cells  
132 that lack ASC (Fig.2E), we asked if ORF3a activated the inflammasome solely in an ASC-

133 independent manner. We found that ORF3a's ability to activate pro-caspase 1 was substantially  
134 impaired upon depletion of ASC in A549 cells (Fig.2F), supporting the idea that ORF3a activates  
135 the inflammasome in both ASC-dependent and -independent ways. To assess if ORF3a also  
136 mediates activation of other prominent inflammasomes including NLRP1 and NLRC4, we  
137 depleted each of these molecules but were unable to block cleavage of pro-caspase 1 (Fig.2G),  
138 indicating that ORF3a predominantly activates the NLRP3 inflammasome.

139

#### 140 **ORF3a triggers NLRP3 inflammasome assembly via K<sup>+</sup> efflux.**

141 With NEK7 a key mediator of NLRP3 activation downstream of potassium efflux, and efflux of  
142 potassium ions a central mechanism of NLRP3 activation, particularly by ion channel-inducing  
143 viroporins<sup>15,16,21</sup>, we investigated the effect of blocking potassium efflux by raising the  
144 extracellular concentration of K<sup>+</sup> and found that ORF3a-mediated caspase 1 cleavage was  
145 abrogated (Fig.3A). To identify the type of K<sup>+</sup> channel formed by ORF3a, we employed known  
146 pharmacologic inhibitors including quinine, barium, iberiotoxin, and tetraethylammonium to block  
147 two-pore domain K<sup>+</sup> channels, inward-rectifier K<sup>+</sup> channels, large conductance calcium-activated  
148 K<sup>+</sup> channels, and voltage gated K<sup>+</sup> channels, respectively<sup>22</sup>. Mimicking the ability of barium to  
149 block the release of SARS-CoV virions<sup>23</sup> and supporting the finding in Fig.3A, barium was able  
150 to curb CoV-2 ORF3a-mediated activation of caspase 1, indicating that ORF3a forms inward-  
151 rectifier K<sup>+</sup> channels in the cell membrane (Fig.3B). Restricting K<sup>+</sup> efflux also impaired ORF3a's  
152 ability to trigger assembly of both ASC-independent and -dependent NLRP3 inflammasomes  
153 (Figs.3C and D, respectively). Notably, not only did SARS-CoV-2 activate the inflammasome  
154 upon infection of A549 and HEK-293T cells, but this activation was dampened by MCC950 and

155 blocking K<sup>+</sup> efflux (Figs.3E and F), asserting the importance of ion channels and NLRP3 in  
156 triggering the inflammatory response in CoV-2 infected cells.

157

158 **Key residues in ORF3a important for activating the inflammasome are well conserved.**

159 Alignment of ORF3a sequences from SARS-CoV-2 isolates from Asia, Europe, Middle-East,  
160 Russia, and North and South America between December 2019 and June 2020 as well as other bat  
161 CoVs and SARS-CoV revealed the conservation of two out of three key cysteine residues (residues  
162 127, 130, and 133), shown to be essential for K<sup>+</sup> channel formation by SARS-CoV<sup>21</sup> (Fig.4A).  
163 The exception, cysteine 127, was replaced by leucine in all CoV-2 isolates. We also observed a  
164 similar switch from cysteine to valine at position 121 and a switch from asparagine to cysteine at  
165 position 153 in all CoV-2 isolates. Introducing single point mutations at positions 127, 130, and  
166 133 of CoV-2 ORF3a impaired its ability to activate the inflammasome, supporting the need for  
167 not only the two conserved cysteines at positions 130 and 133 but also that of the newly acquired  
168 leucine at position 127 of CoV-2 ORF3a (Fig.4B). Similarly, mutating the residues at positions  
169 121 and 153, both newly acquired in CoV-2 though conserved in all isolates, resulted in a  
170 dampened response by the inflammasome (Fig.4B). Thus, SARS-CoV-2 ORF3a has retained some  
171 of the key residues needed for virus release and inflammasome activation but it has acquired  
172 additional changes that support a functionally consequential divergence from earlier CoVs.  
173 Nonetheless, this domain bearing the abovementioned residues that is essential for forming ion  
174 channels for virus release has remained remarkably well conserved throughout the pandemic,  
175 thereby maintaining its ability to activate the inflammasome.

176



177 **Discussion**

178 In summary, an essential viroporin required for release of SARS-CoV-2 from infected cells is also  
179 able to prime and activate the NLRP3 inflammasome, the machinery responsible for much of the  
180 inflammatory pathology in severely ill patients. ORF3a's indispensability to the virus's life cycle  
181 makes it an important therapeutic candidate. Moreover, while different from its homologs in other  
182 CoVs, the high conservation of the newly divergent SARS-CoV-2 ORF3a across isolates from  
183 several continents combined with our observation that multiple single point mutations reduce its  
184 ability to activate the inflammasome, argues against rapid emergence of resistance phenotypes.  
185 Thus, targeting ORF3a has the dual potential of blocking virus spread and inflammation.

186

187 SARS-CoV-2 is not only linked to severe and fatal outcomes in adults with underlying  
188 comorbidities associated with pre-existing inflammation, but it also causes severe disease in  
189 children in the form of Multisystem Inflammatory Syndrome in Children (MIS-C) as well as in  
190 adults as MIS-A<sup>24,25</sup>. Dampening the inflammatory response in such patients is therefore an  
191 attractive strategy – a strategy that has shown promise in a small group of patients treated with  
192 Anakinra, a recombinant IL-1R antagonist<sup>26</sup>. Notably, for several inflammatory diseases, there is  
193 keen interest within the pharmaceutical industry in therapeutically targeting the inflammatory  
194 pathway at a further upstream point, namely NLRP3 itself. MCC950 is a prototype of this approach  
195 with several other related compounds undergoing preclinical, phase I, and phase II trials  
196 ([https://cen.acs.org/pharmaceuticals/drug-discovery/Could-an-NLRP3-inhibitor-be-the-one-drug-](https://cen.acs.org/pharmaceuticals/drug-discovery/Could-an-NLRP3-inhibitor-be-the-one-drug-to-conquer-common-diseases/98/i7)  
197 [to-conquer-common-diseases/98/i7](https://cen.acs.org/pharmaceuticals/drug-discovery/Could-an-NLRP3-inhibitor-be-the-one-drug-to-conquer-common-diseases/98/i7)). Along the same lines, Gasdermin D, also activated by  
198 ORF3a, presents yet another therapeutic target as it may potentiate virus release by killing cells in

199 addition to causing inflammation. Additionally, restraining the NLRP3 inflammasome may  
200 secondarily stifle virus replication itself as we recently demonstrated for a DNA tumor virus <sup>27</sup>.

201

202 Aside from ORF3a, other viroporins such as ORF-E and ORF8 may also contribute to the  
203 inflammatory response by similar or related mechanisms. Activation of the NLRP3 inflammasome  
204 also bears mention in broader contexts. In particular, two recent reports have found that a fraction  
205 of severely ill COVID-19 patients display defective type I interferon immunity <sup>28,29</sup>. It is likely that  
206 severe disease in these individuals also stemmed from unchecked pro-inflammatory responses  
207 since type I interferon can counteract the NLRP3 inflammasome in a number of ways <sup>30</sup>. Similarly,  
208 for those who have metabolic disturbances such as hypokalemia that often results from  
209 antihypertensive medications, ORF3a may have a lower threshold for activating the inflammasome  
210 due to a higher K<sup>+</sup> gradient across the infected cell.

211

## 212 **References**

- 213 1 Liu, Y. *et al.* Viral dynamics in mild and severe cases of COVID-19. *Lancet Infect Dis*,  
214 doi:10.1016/S1473-3099(20)30232-2 (2020).
- 215 2 Mehta, P. *et al.* COVID-19: consider cytokine storm syndromes and immunosuppression.  
216 *Lancet* **395**, 1033-1034, doi:10.1016/S0140-6736(20)30628-0 (2020).
- 217 3 Jin, Y. & Fu, J. Novel Insights Into the NLRP 3 Inflammasome in Atherosclerosis. *J Am*  
218 *Heart Assoc* **8**, e012219, doi:10.1161/JAHA.119.012219 (2019).

- 219 4 Rheinheimer, J., de Souza, B. M., Cardoso, N. S., Bauer, A. C. & Crispim, D. Current role  
220 of the NLRP3 inflammasome on obesity and insulin resistance: A systematic review.  
221 *Metabolism* **74**, 1-9, doi:10.1016/j.metabol.2017.06.002 (2017).
- 222 5 Stienstra, R. *et al.* Inflammasome is a central player in the induction of obesity and insulin  
223 resistance. *Proc Natl Acad Sci U S A* **108**, 15324-15329, doi:10.1073/pnas.1100255108  
224 (2011).
- 225 6 Chen, W. *et al.* Activation of the TXNIP/NLRP3 inflammasome pathway contributes to  
226 inflammation in diabetic retinopathy: a novel inhibitory effect of minocycline. *Inflamm Res*  
227 **66**, 157-166, doi:10.1007/s00011-016-1002-6 (2017).
- 228 7 Dixit, V. D. Nlrp3 inflammasome activation in type 2 diabetes: is it clinically relevant?  
229 *Diabetes* **62**, 22-24, doi:10.2337/db12-1115 (2013).
- 230 8 Grant, R. W. & Dixit, V. D. Mechanisms of disease: inflammasome activation and the  
231 development of type 2 diabetes. *Front Immunol* **4**, 50, doi:10.3389/fimmu.2013.00050  
232 (2013).
- 233 9 Richardson, S. *et al.* Presenting Characteristics, Comorbidities, and Outcomes Among  
234 5700 Patients Hospitalized With COVID-19 in the New York City Area. *JAMA*,  
235 doi:10.1001/jama.2020.6775 (2020).
- 236 10 Wu, Z. & McGoogan, J. M. Characteristics of and Important Lessons From the  
237 Coronavirus Disease 2019 (COVID-19) Outbreak in China: Summary of a Report of 72314  
238 Cases From the Chinese Center for Disease Control and Prevention. *JAMA*,  
239 doi:10.1001/jama.2020.2648 (2020).

- 240 11 Yang, J. *et al.* Prevalence of comorbidities and its effects in coronavirus disease 2019  
241 patients: A systematic review and meta-analysis. *Int J Infect Dis* **94**, 91-95,  
242 doi:10.1016/j.ijid.2020.03.017 (2020).
- 243 12 Dediego, M. L. *et al.* Pathogenicity of severe acute respiratory coronavirus deletion  
244 mutants in hACE-2 transgenic mice. *Virology* **376**, 379-389,  
245 doi:10.1016/j.virol.2008.03.005 (2008).
- 246 13 Ahn, M. *et al.* Dampened NLRP3-mediated inflammation in bats and implications for a  
247 special viral reservoir host. *Nat Microbiol* **4**, 789-799, doi:10.1038/s41564-019-0371-3  
248 (2019).
- 249 14 Ratajczak, M. Z. *et al.* SARS-CoV-2 Entry Receptor ACE2 Is Expressed on Very Small  
250 CD45(-) Precursors of Hematopoietic and Endothelial Cells and in Response to Virus  
251 Spike Protein Activates the Nlrp3 Inflammasome. *Stem Cell Rev Rep*, doi:10.1007/s12015-  
252 020-10010-z (2020).
- 253 15 Farag, N. S., Breitingner, U., Breitingner, H. G. & El Azizi, M. A. Viroporins and  
254 inflammasomes: A key to understand virus-induced inflammation. *Int J Biochem Cell Biol*  
255 **122**, 105738, doi:10.1016/j.biocel.2020.105738 (2020).
- 256 16 He, Y., Zeng, M. Y., Yang, D., Motro, B. & Nunez, G. NEK7 is an essential mediator of  
257 NLRP3 activation downstream of potassium efflux. *Nature* **530**, 354-357,  
258 doi:10.1038/nature16959 (2016).
- 259 17 Broz, P. & Dixit, V. M. Inflammasomes: mechanism of assembly, regulation and  
260 signalling. *Nat Rev Immunol* **16**, 407-420, doi:10.1038/nri.2016.58 (2016).
- 261 18 Puelles, V. G. *et al.* Multiorgan and Renal Tropism of SARS-CoV-2. *N Engl J Med* **383**,  
262 590-592, doi:10.1056/NEJMc2011400 (2020).

- 263 19 Hoffmann, M. *et al.* SARS-CoV-2 Cell Entry Depends on ACE2 and TMPRSS2 and Is  
264 Blocked by a Clinically Proven Protease Inhibitor. *Cell* **181**, 271-280 e278,  
265 doi:10.1016/j.cell.2020.02.052 (2020).
- 266 20 Coll, R. C. *et al.* MCC950 directly targets the NLRP3 ATP-hydrolysis motif for  
267 inflammasome inhibition. *Nat Chem Biol* **15**, 556-559, doi:10.1038/s41589-019-0277-7  
268 (2019).
- 269 21 Chen, I. Y., Moriyama, M., Chang, M. F. & Ichinohe, T. Severe Acute Respiratory  
270 Syndrome Coronavirus Viroporin 3a Activates the NLRP3 Inflammasome. *Front*  
271 *Microbiol* **10**, 50, doi:10.3389/fmicb.2019.00050 (2019).
- 272 22 Di, A. *et al.* The TWIK2 Potassium Efflux Channel in Macrophages Mediates NLRP3  
273 Inflammasome-Induced Inflammation. *Immunity* **49**, 56-65 e54,  
274 doi:10.1016/j.immuni.2018.04.032 (2018).
- 275 23 Lu, W. *et al.* Severe acute respiratory syndrome-associated coronavirus 3a protein forms  
276 an ion channel and modulates virus release. *Proc Natl Acad Sci U S A* **103**, 12540-12545,  
277 doi:10.1073/pnas.0605402103 (2006).
- 278 24 Feldstein, L. R. *et al.* Multisystem Inflammatory Syndrome in U.S. Children and  
279 Adolescents. *N Engl J Med* **383**, 334-346, doi:10.1056/NEJMoa2021680 (2020).
- 280 25 Morris, S. B. *et al.* Case series of Multisystem Inflammatory Syndrome in Adults  
281 associated with SARS-CoV-2 infection - United Kingdom and United States, March-  
282 August 2020. *Morbidity and Mortality Weekly Report (MMWR)* **69**, 1450-1456 (2020).
- 283 26 Cavalli, G. *et al.* Interleukin-1 blockade with high-dose anakinra in patients with COVID-  
284 19, acute respiratory distress syndrome, and hyperinflammation: a retrospective cohort  
285 study. *Lancet Rheumatology*, doi:[https://doi.org/10.1016/S2665-9913\(20\)30127-2](https://doi.org/10.1016/S2665-9913(20)30127-2) (2020).

- 286 27 Burton, E. M., Goldbach-Mansky, R. & Bhaduri-McIntosh, S. A promiscuous  
287 inflammasome sparks replication of a common tumor virus. *Proc Natl Acad Sci U S A* **117**,  
288 1722-1730, doi:10.1073/pnas.1919133117 (2020).
- 289 28 Bastard, P. *et al.* Auto-antibodies against type I IFNs in patients with life-threatening  
290 COVID-19. *Science*, doi:10.1126/science.abd4585 (2020).
- 291 29 Zhang, Q. *et al.* Inborn errors of type I IFN immunity in patients with life-threatening  
292 COVID-19. *Science*, doi:10.1126/science.abd4570 (2020).
- 293 30 Labzin, L. I., Lauterbach, M. A. & Latz, E. Interferons and inflammasomes: Cooperation  
294 and counterregulation in disease. *J Allergy Clin Immunol* **138**, 37-46,  
295 doi:10.1016/j.jaci.2016.05.010 (2016).

296

## 297 **Acknowledgements**

298 **Funding:** This research was conducted with funding from the Children’s Miracle Network and  
299 the University of Florida (S.B.-M).

300 **Author contributions:** Conceptualization: H.X., S.B.-M.; Methodology: H.X., M.T.M., S.B.-M.;  
301 Validation: H.X., S.B.-M.; Formal analysis: H.X., S.B.-M.; Investigation: H.X., S.A.C., I.A.A.,  
302 J.G., J.L., M.T.M.; Writing – original draft preparation: H.X., S.B.-M.; Writing – review and  
303 editing: M.T.M., S.B.-M.; Visualization: H.X., S.B.-M., M.T.M.; Supervision: S.B.-M.; Project  
304 administration: S.B.-M., Funding acquisition: S.B.-M.

305 **Competing interests:** Authors declare no competing interests.

306 **Data and materials availability:** All data is available in the main text or the supplementary  
307 materials.

308

309 **Figures and legends**

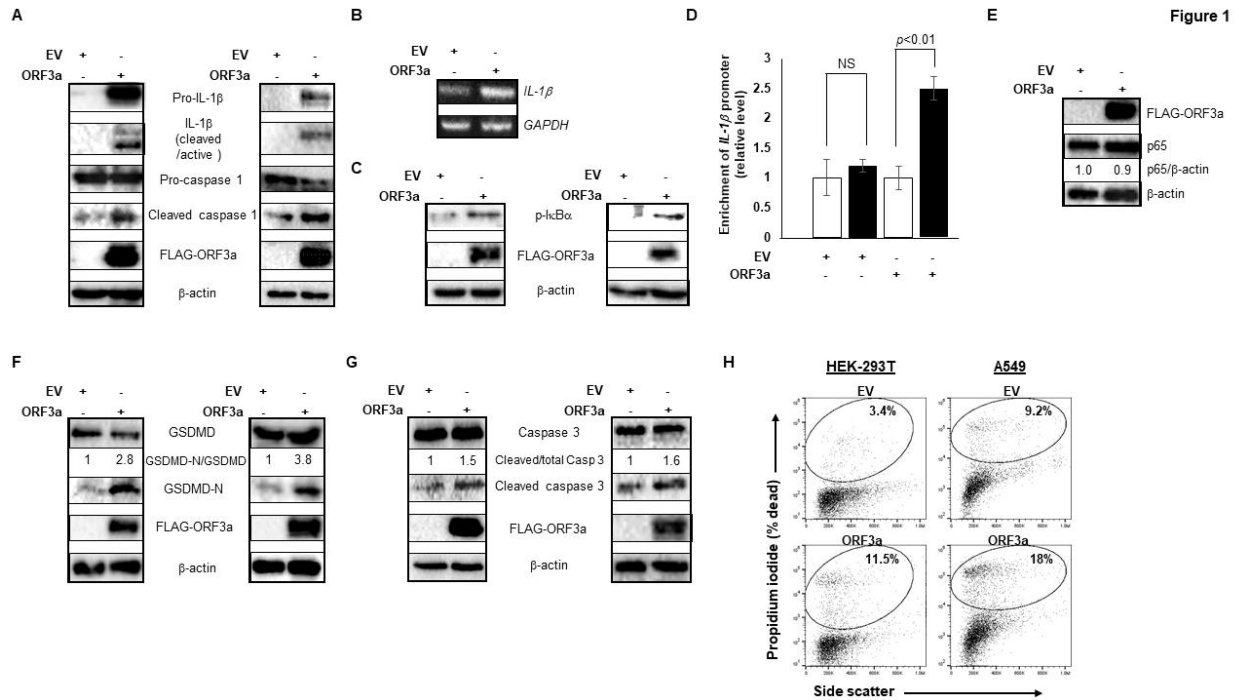

310 **Figure 1. ORF3a primes and activates the inflammasome, causing cell death.** HEK-293T cells  
 311 (A, C, F, G; left panels) or A549 cells (A, C, F, G; right panels) were transfected with FLAG-  
 312 tagged ORF3a or empty vector (EV) and harvested after 24 hours for immunoblotting with  
 313 indicated antibodies. (B, D, E) ORF3a-transfected A549 cells were analyzed at 24 hours by reverse  
 314 transcriptase-quantitative PCR for *IL-1 $\beta$*  mRNA abundance (B), ChIP-PCR to quantify relative  
 315 enrichment of NF $\kappa$ B p65 at the *IL-1 $\beta$*  promoter using anti-p65 antibodies (black bar) or control  
 316 IgG (white bar) (D), or immunoblotting as indicated (E). Unfixed cells harvested 24 hours after  
 317 transfection with EV or ORF3a were stained with propidium iodide followed by flow cytometry  
 318 to enumerate percent dead cells in H. Error bars in D represent SEM. All experiments were  
 319 performed three times.

320

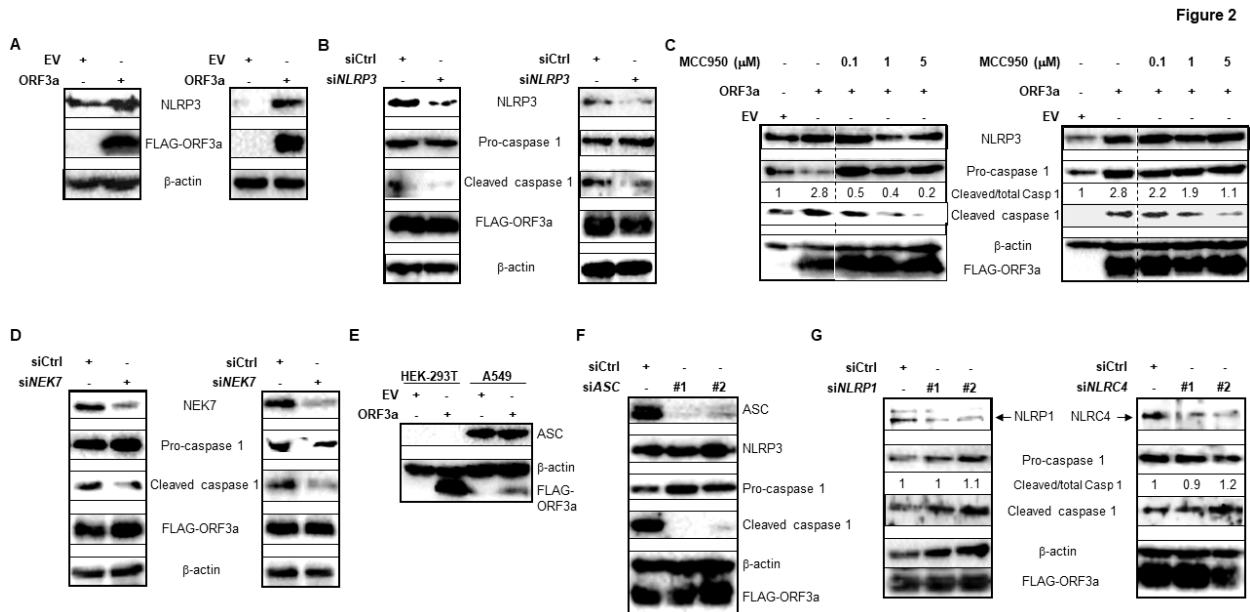

321 **Figure 2. ORF3a activates the NEK7-NLRP3 inflammasome via ASC-dependent and**  
 322 **independent modes.** (A) Cell lysates of FLAG-ORF3a- or EV-transfected HEK-293T (left) or  
 323 A549 cells (right) were immunoblotted with indicated antibodies. (B, D) HEK-293T (left) or A549  
 324 cells (right) were co-transfected with FLAG- ORF3a and control siRNA (B, D), *NLRP3* siRNA  
 325 (B), or *NEK7* siRNA (D) for 24 hours prior to immunoblotting with indicated antibodies. (C) HEK-  
 326 293T (left) or A549 cells (right) were transfected with EV or FLAG-ORF3a and exposed to  
 327 MCC950 for 24 hours prior to immunoblotting. (E) Cell lysates were immunoblotted with  
 328 indicated antibodies. (F, G) A549 cells were co-transfected with FLAG-ORF3a and control siRNA,  
 329 *ASC* siRNA (F), *NLRP1* siRNA (G; left), or *NLRC4* siRNA (G, right) for 24 hours prior to  
 330 immunoblotting with indicated antibodies. Experiments were performed at least thrice.

331



332

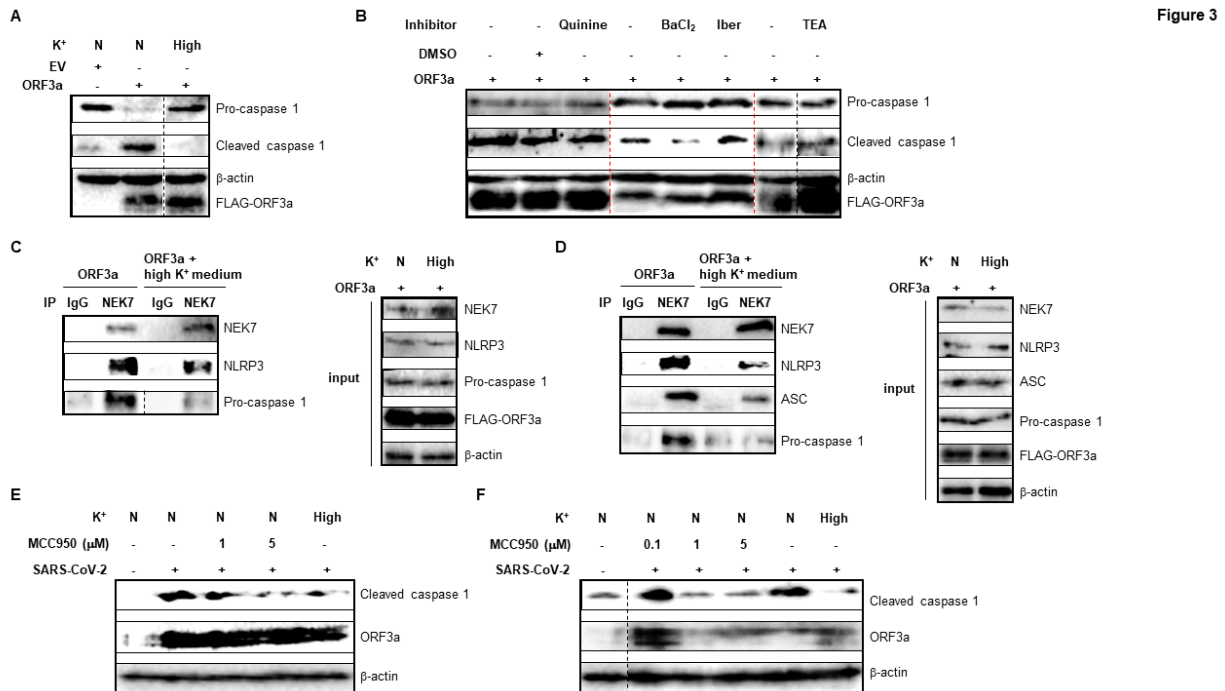

Figure 3

333

334 **Figure 3. ORF3a-mediated activation of NLRP3 inflammasome requires K<sup>+</sup> efflux.** (A)

335 FLAG-ORF3a plasmid or EV were introduced into A549 cells. After 20 hours, cells were left in

336 normal medium (N) or exposed to medium with high K<sup>+</sup> (50mM; to block K<sup>+</sup> efflux; High). Cells

337 were harvested 4 hours later, and extracts immunoblotted with indicated antibodies. (B) A549 cells

338 transfected with FLAG-ORF3a were exposed to indicated potassium channel inhibitors quinine,

339 barium (BaCl<sub>2</sub>), iberiotoxin (Iber), and tetraethylammonium (TEA) for 24 hours prior to

340 immunoblotting with different antibodies. (C and D) FLAG-ORF3a plasmid was introduced into

341 HEK-293T (C) and A549 (D) cells. After 20 hours, cells were left in normal medium (N) or

342 exposed to medium with high K<sup>+</sup> (High). Cells were harvested 4 hours later, and extracts

343 immunoblotted (Input) or immunoprecipitated with control IgG or anti-NEK7 antibody followed

344 by immunoblotting with indicated antibodies. Input represents 5% of sample. (E and F) HEK293T

345 (E) and A549 (F) cells were infected with SARS-CoV-2 in the presence of MCC950 or high K<sup>+</sup>

346 containing medium (High; for the last 20 hours of culture) and harvested after 24 hours for  
 347 immunoblotting with indicated antibodies. Experiments were performed twice.

348

349

Figure 4

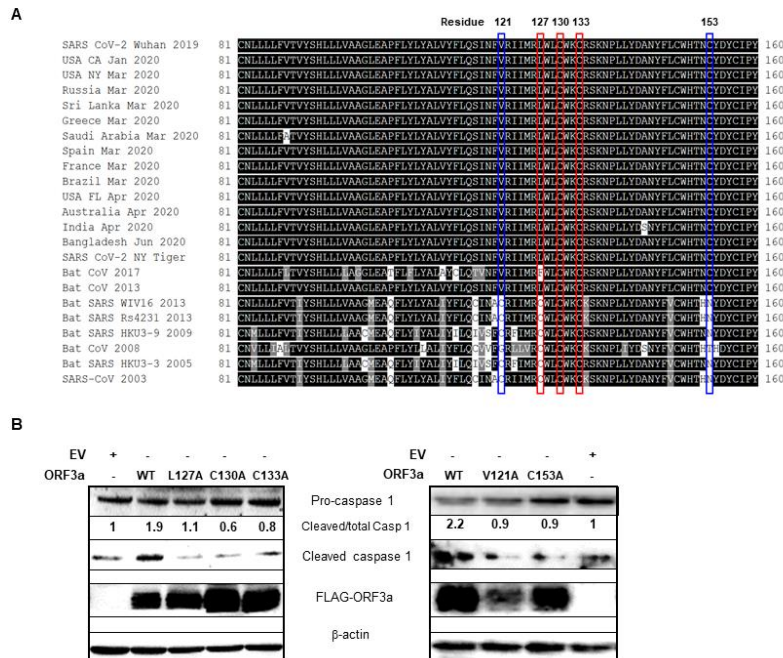

350

351 **Figure 4. ORF3a residues required for inflammasome activation are conserved in SARS-**

352 **CoV-2 isolates across continents.** (A) ORF3a/ORF3 viroporin from SARS-like

353 betacoronaviruses including temporally and geographically distinct isolates from the COVID-19

354 pandemic and diverse species isolates dating back to the original SARS pandemic of 2003 were

355 aligned in CLUSTAL Omega using EMBL-EBI Server Tools

356 ([https://www.ebi.ac.uk/Tools/services/web\\_clustalo/toolform.ebi](https://www.ebi.ac.uk/Tools/services/web_clustalo/toolform.ebi)). Selected isolates displaying

357 the most diversity are shown from positions 81 to 160 of ORF3a/ORF3. Conserved cysteine

358 residues previously identified in SARS-CoV as critical to K<sup>+</sup> ion channel formation are outlined

359 in red. Newly divergent residues (121 and 153) conserved across SARS-CoV-2 isolates are

360 outlined in blue. The multiple sequence alignment was shaded in BoxShade hosted by ExPASy  
361 ([https://embnet.vital-it.ch/software/BOX\\_form.html](https://embnet.vital-it.ch/software/BOX_form.html)). (B) A549 cells were transfected with EV,  
362 wild-type FLAG-ORF3a (WT), or FLAG-ORF3a mutants. Cells were harvested 24 hours later and  
363 immunoblotted with indicated antibodies. Experiments were performed at least twice.

364

## 1 **Methods**

### 2 **Cell lines and infection**

3 Human embryonic kidney-293T (HEK-293T) cells were maintained in DMEM  
4 (Thermo Fisher Scientific, Cat. 11965118) containing 10% fetal bovine serum  
5 (GEMINI, Cat. 900108) and 1% penicillin/streptomycin (Gibco, Cat. 15140122). A549  
6 cells were maintained in Ham's F-12 Nutrient Mix (Thermo Fisher Scientific, Cat.  
7 11765054) containing 10% fetal bovine serum and 1% penicillin/streptomycin. Both  
8 cell lines were cultured in the presence of 5% CO<sub>2</sub> at 37 °C. Cells were infected in a  
9 BSL-3 lab with the UF-1 strain of SARS-CoV-2 at MOI of 4 in media containing 3%  
10 low IgG FBS (Fisher Scientific, Cat. SH30070.03).

11

### 12 **Plasmids, siRNAs, and transfection**

13 The *ORF3a* gene without stop codon (nt 25,382-26,206, GenBank accession no.  
14 MT295464.1) was PCR amplified with forward primer  
15 (5'CGCGGATCCATGGATTTGTTTATGAGAATCTT3') and reverse primer (5'  
16 AAGGAAAAAAGCGGCCGCCAAAGGCACGCTAGTAGTC3') by using Phusion  
17 High-Fidelity DNA Polymerase (New England Biolabs, M0530L) according to the  
18 manufacturer's protocol and inserted into pcDNA5.1/FRT/TO vector (a kind gift from  
19 professor Torben Heick Jensen, Denmark) with a C-terminal 3×FLAG tag to generate  
20 FLAG-tagged ORF3a plasmid. Flag-tagged ORF3a mutants (V121A, L127A, C130A,  
21 C133A, C153A) were constructed by overlap extension PCR with the following primer  
22 pairs:

23 5'GAGTATAAACTTTGCAAGAATAATAATGAG3' (forward) and

24 5'CTCATTATTATTCTTGCAAAGTTTATACTC3' (reverse),

25 5'ATAATGAGGGCTTGGCTTTG3' (forward) and

26 5'CAAAGCCAAGCCCTCATTAT3' (reverse),

27 5'GCTTTGGCTTGCCTGGAAATGC3' (forward) and

28 5'GCATTTCCAGGCAAGCCAAAGC3' (reverse),

29 5'TGCTGGAAAGCCCGTTCCAAA3' (forward) and

30 5'TTTGGAACGGGCTTTCCAGCA3' (reverse),

31 5'GCATACTAATGCTTACGACTATTG3' (forward) and

32 5'CAATAGTCGTAAGCATTAGTATGC3' (reverse), respectively.

33 HEK-293T and A549 cells were transfected with LipoJet™ In Vitro Transfection Kit

34 (SignaGen Laboratories, SL100468) according to the manufacturer's protocol.

35 HEK-293T and A549 cells were transfected with 200 pmoles of siRNA. siRNAs

36 included *NLRP3* (Ambion, Cat. s41554), *NEK7* (Ambion, Cat. 103794), *ASC* (Ambion,

37 Cat. 44232 and 289672), *NLRP1* (#1, Ambion, Cat. S22520; #2, Ambion, Cat. 239345),

38 *NLRC4* ((#1, Ambion, Cat. S33828; #2, Ambion, Cat. 105219), and control

39 (Dharmacon, Cat. D001810-01-20).

40

#### 41 **SARS-CoV-2**

42 A passage two stock of *Severe acute respiratory syndrome coronavirus 2* isolate SARS-

43 CoV-2/human/USA/UF-1/2020 (GenBank MT295464) was used for virus-infection

44 studies. The virus was the first isolate from a patient at the University of Florida Health

45 Shands Hospital (J. Lednicky, unpublished) and has about 99% nt identity with SARS-  
46 CoV-2 reference strain Wuhan-Hu-1 (GenBank NC\_045512.2) and 100% identity with  
47 the genomes of SARS-CoV-2 detected in California, USA. The genome of SARS-CoV-  
48 2 UF-1 encodes an aspartic acid residue at amino acid 614 of the spike protein. This  
49 virus was isolated and then propagated (one passage) in VeroE6 cells prior to sequence  
50 analyses and use in this work, and has no INDELS in its genome. All work with this  
51 virus was performed in a BSL-3 laboratory by an analyst using a full-head powered-air  
52 purifying respirator and appropriate personal protective equipment, including gloves  
53 and a chemically impervious Tyvek gown.

54

#### 55 **Chemical treatment of cell lines**

56 HEK-293T and A549 cells were transfected with plasmids. After 2h, different chemical  
57 reagents were added to medium. Chemical reagents included NLRP3 inhibitor  
58 MCC950 (0.1–5  $\mu$ M) (Sigma Aldrich, Cat. 538120), Quinine (10  $\mu$ M) (Sigma Aldrich,  
59 Cat. 145904), Barium chloride (2 mM) (Sigma Aldrich, Cat. 342920),  
60 Tetraethylammonium chloride (5 mM) (Tocris Bioscience, Cat. 306850), and  
61 Iberiotoxin (1.0  $\mu$ M) (Tocris Bioscience, Cat. 1086100U). All chemicals were dissolved  
62 with DMSO or sterile water.

63

#### 64 **Reverse transcription PCR (RT-PCR)**

65 RT-PCR was performed as previously described<sup>1</sup>. Briefly, 1  $\mu$ g of total RNA was used  
66 as template for complementary DNA synthesis using MuLV reverse transcriptase (New

67 England Biolabs, Cat. M0253L) according to the manufacture's protocol. OneTaq DNA  
68 Polymerase (New England Biolabs, Cat. M0480S) was used to amplify DNA fragment  
69 using manufacture's protocol. RT-PCR primers were as following:  
70 forward primer 5'ACCATCTTCCAGGAGCGAGA3' and  
71 reverse primer 5'GGCCATCCACAGTCTTCTGG 3' for *GAPDH* mRNA,  
72 forward primer 5'TCAGCCAATCTTCATTGCTC3' and  
73 reverse primer 5'GCCATCAGCTTCAAAGAACA3' for *IL-1 $\beta$*  pre-mRNA <sup>2</sup>.

74

#### 75 **Immunoblotting and antibodies**

76 Immunoblotting was performed as previously described <sup>3</sup>. Briefly, total cell lysates  
77 were electrophoresed on 10% or 12% SDS-polyacrylamide gels and transferred onto  
78 nitrocellulose membranes and immunoassayed with indicated antibodies. The  
79 following antibodies were used: rabbit anti-Caspase-1 antibody (Thermo Scientific, Cat.  
80 PA587536), rabbit anti-cleaved Caspase-1 antibody (Thermo Scientific, Cat.  
81 PA538099), mouse anti-IL-1 $\beta$  (Cell Signaling Technology, Cat. 12242s), mouse anti-  
82 Flag M2 antibody (Sigma-Aldrich, Cat. F1804), mouse anti- $\beta$ -actin antibody (Sigma-  
83 Aldrich, Cat. A5441), rabbit anti-phospho-I $\kappa$ B $\alpha$  (Ser32) antibody (Cell Signaling  
84 Technology, Cat. 2859s), rabbit anti-I $\kappa$ B $\alpha$  antibody (Cell Signaling Technology, Cat.  
85 9242s), rabbit anti-NF- $\kappa$ B p65 antibody (Cell Signaling Technology, Cat. 8242s), rabbit  
86 anti-Caspase 3 antibody (GeneTex, Cat. GTX110543), rabbit anti-Gasdermin D (L60)  
87 antibody (Cell Signaling Technology, Cat. 93709s), rabbit anti-cleaved-Gasdermin D  
88 (Asp275) antibody (Cell Signaling Technology, Cat. 36425s), rabbit anti-NLRP3

89 antibody (Invitrogen, Cat. PA5-21745), rabbit anti-NEK7 antibody (Cell Signaling  
90 Technology, Cat. 3057s), rabbit anti-ASC antibody (Cell Signaling Technology, Cat.  
91 13833s), rabbit anti-NLRP1 antibody (Novus Biologicals, Cat. NB100-56147SS),  
92 rabbit anti-NLRC4 antibody (Novus Biologicals, Cat. NB100-56142SS), rabbit anti-  
93 SARS-CoV-2 ORF3a antibody (FabGennix, Cat. SARS-COV2-ORF3A-101AP), HRP-  
94 conjugated goat anti-mouse IgG(H+L) (Thermo Scientific, Cat. 626520) and HRP  
95 conjugated goat anti-rabbit IgG(H+L) (Thermo Scientific, Cat. 31460), and HRP  
96 conjugated goat anti-rabbit IgG (light chain) (Novus, Cat. NBP2-75935).

97

#### 98 **Flow cytometry**

99 Flow cytometry was performed as previous described <sup>4</sup>. Briefly, HEK-293T and A549  
100 cells were treated with trypsin for 3 min and collected by centrifugation at 350g for 3  
101 min. Cell pellets were washed twice with FACS buffer (1X PBS with 2% FBS) and  
102 resuspended in 200 µl of RNase-containing FACS buffer. 20 µl of propidium iodide (10  
103 µg/ml) (Sigma-Aldrich, Cat. P4864) was added to each sample and subjected to flow  
104 cytometry immediately to assay cell death.

105

#### 106 **Chromatin immunoprecipitation-quantitative PCR (ChIP-qPCR)**

107 ChIP was performed as described previously <sup>5</sup>. Briefly, A549 cells were transfected  
108 with FLAG-ORF3a or empty vector as control. Twenty-four hours later, cells ( $7.5 \times 10^5$   
109 cells for each ChIP) were crosslinked with 1% formaldehyde for 20 min and quenched  
110 with 0.125 M glycine. Cells were lysed in 500 µl of nuclear extraction buffer A (Cell



111 Signaling Technology, Cat. 7006) on ice for 15 min and washed once with 500  $\mu$ l of  
112 nuclear extraction buffer B (Cell Signaling Technology, Cat. 7007), and then treated  
113 with 0.5  $\mu$ L of micrococcal nuclease (Cell Signaling Technology, Cat. 10011) for 20  
114 min at 37 °C. Nuclei were resuspended in 1 $\times$ ChIP buffer (Cell Signaling Technology,  
115 Cat. 7008) and sonicated at 8W with 10-s on and 20-s off pulses on ice for two cycles  
116 to break nuclear membranes. After removing debris, 2% of each sample was set aside  
117 as input and the rest (98%) of the sample was incubated with 3  $\mu$ g of antibody (or 3  $\mu$ g  
118 of IgG as control) and 30  $\mu$ l of protein G magnetic beads (Cell Signaling Technology,  
119 Cat. 7008) at 4 °C overnight. Beads were washed three times with low salt ChIP buffer  
120 and once with high salt ChIP buffer. The protein-DNA complex were eluted with  
121 1 $\times$ Elution buffer (Cell Signaling Technology, Cat. 10009). DNA was extracted with  
122 DNA purification columns (Cell Signaling Technology, Cat. 10010) and subjected to  
123 qPCR analysis. The following primers were used for amplifying the *IL-1 $\beta$*  promoter:  
124 forward primer 5'AGGAGTAGCAAACCTATGACAC3' and  
125 reverse primer 5'ACGTGGGAAAATCCAGTATTT3'<sup>6</sup>.

126

### 127 **Co-Immunoprecipitation (Co-IP)**

128 Co-IP was performed as described previously<sup>7</sup>. Cells were lysed in ice-cold IP Lysis  
129 Buffer (Thermo Scientific, Cat. 87787) in the presence of 1 $\times$ protease inhibitor cocktail  
130 (Cell Signaling, #7012) for 15min followed by centrifugation (14,000 rpm) at 4 °C  
131 for 5 min. Of pre-cleared cell lysates, 5% was set aside as input. The rest was incubated  
132 with 3.0  $\mu$ g of rabbit anti-NEK7 antibody (Bethyl Laboratories, Cat. A302-684A) or

133 the same amount of control IgG (R&D, Cat. AB-105-C) together with 40  $\mu$ l of  
134 Dynabeads Protein G (Thermo Scientific, Cat. 10003D) at 4 °C overnight. Beads were  
135 washed three times with IP lysis buffer and subjected to immunoblotting.

136

### 137 **Statistical analysis**

138 Unpaired Student's t test was used to calculate *p* values by comparing the means of two  
139 groups.

140

### 141 **References**

142 1 King, C. A., Li, X., Barbachano-Guerrero, A. & Bhaduri-McIntosh, S. STAT3  
143 Regulates Lytic Activation of Kaposi's Sarcoma-Associated Herpesvirus. *J Virol*  
144 **89**, 11347-11355, doi:10.1128/JVI.02008-15 (2015).

145 2 Siu, K. L. *et al.* Severe acute respiratory syndrome coronavirus ORF3a protein  
146 activates the NLRP3 inflammasome by promoting TRAF3-dependent  
147 ubiquitination of ASC. *FASEB J* **33**, 8865-8877, doi:10.1096/fj.201802418R  
148 (2019).

149 3 Burton, E. M., Goldbach-Mansky, R. & Bhaduri-McIntosh, S. A promiscuous  
150 inflammasome sparks replication of a common tumor virus. *Proc Natl Acad Sci*  
151 *U S A* **117**, 1722-1730, doi:10.1073/pnas.1919133117 (2020).

152 4 Xu, H. *et al.* Novel replisome-associated proteins at cellular replication forks in  
153 EBV-transformed B lymphocytes. *PLoS Pathog* **15**, e1008228,  
154 doi:10.1371/journal.ppat.1008228 (2019).

- 155 5 Li, X. *et al.* KRAB-ZFP Repressors Enforce Quiescence of Oncogenic Human  
156 Herpesviruses. *J Virol* **92**, doi:10.1128/JVI.00298-18 (2018).
- 157 6 Hiscott, J. *et al.* Characterization of a functional NF-kappa B site in the human  
158 interleukin 1 beta promoter: evidence for a positive autoregulatory loop. *Mol*  
159 *Cell Biol* **13**, 6231-6240, doi:10.1128/mcb.13.10.6231 (1993).
- 160 7 Li, X., Burton, E. M. & Bhaduri-McIntosh, S. Chloroquine triggers Epstein-  
161 Barr virus replication through phosphorylation of KAP1/TRIM28 in Burkitt  
162 lymphoma cells. *PLoS Pathog* **13**, e1006249,  
163 doi:10.1371/journal.ppat.1006249 (2017).
- 164
